# Supplementary figures and images for: Experimental evaluation of additional short ranged repulsion in structural oscillation forces
Source: Royal Society of Chemistry journal article supplement (doi:10.1039/c8sm00846a), 2018-01-01

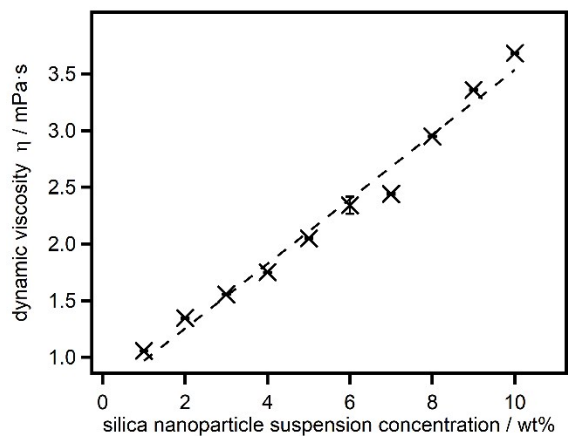

Figs1.

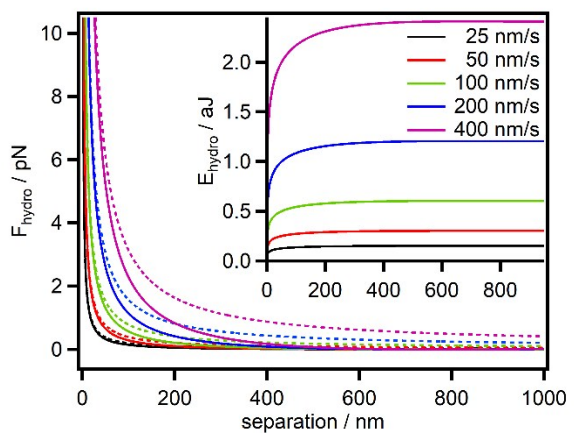

FigS2

Supplement: c8sm00846a1.pdf [file c8sm00846a1.pdf]
